# Supplementary material for: IL-2/JES6-1 mAb complexes dramatically increase sensitivity to LPS through IFN-γ production by CD25+Foxp3- T cells
Source: eLife. 2021 Dec 21;10:e62432. doi: 10.7554/eLife.62432 (PMC8691839; doi:10.7554/eLife.62432)
Supplement: Figure 1—figure supplement 2—source data 1. [file elife-62432-fig1-figsupp2-data1.xlsx]

## Sheet: Fig. 1 - figure supplement 2
Groups	Lung wet weight (g)
	Mean	SD
Control	0.1095	0.007738
IL-2/JES6	0.1762	0.01901
IL-2/S4B6	0.128	0.01246
