# Supplementary material for: IL-2/JES6-1 mAb complexes dramatically increase sensitivity to LPS through IFN-γ production by CD25+Foxp3- T cells
Source: eLife. 2021 Dec 21;10:e62432. doi: 10.7554/eLife.62432 (PMC8691839; doi:10.7554/eLife.62432)
Supplement: Figure 1—source data 1. [file elife-62432-fig1-data1.xlsx]

## Sheet: Figure 1B
Time [hours]	Body temperature [°C]
	Control+10% LPS		Control+100% LPS		IL-2/JES6/1+10% LPS
	Mean	SD	Mean	SD	Mean	SD
0	36.58	0.287	36.53	0.386	36.45	0.48
2	36.3	0.294	36.33	0.34	32.55	0.889
4	36.03	0.263	36.18	0.299	29.55	0.904
6	35.58	0.618	33.73	0.797	28.68	0.957
8	35.1	0.51	32.65	0.614	26.65	0.933
24	36.33	0.556	28.6	0.779

## Sheet: Figure 1C
Time [hours]	Body temperature [°C]
	Control+10% LPS		IL-2/JES6+LPS d6		IL-2/JES6+LPS d4		IL-2/JES6+LPS d3		IL-2/JES6+LPS d2		IL-2/JES6+LPS d1
	Mean	SD	Mean	SD	Mean	SD	Mean	SD	Mean	SD	Mean	SD
0	36.56	0.365	36.42	0.681652	36.64	0.546973	35.91	0.867921	36.18	0.84033	36.25	0.667105
2	36.32	0.228	35.5	0.815475	35.68	0.739594	34.86	0.95551	33.62	1.00598	35.02	0.834865
4	36.06	0.305	35.02	2.57041	33.9	1.66132	30.32	2.55578	29.3	0.754983	30.1	0.940744
6	35.48	0.455	33.32	3.42009	30.62	3.35961	28.62	1.7254	25.14	0.589915	27.88	1.02567
8	35.22	0.421	34.54	2.16171	30.16	1.33903	28.06	1.67422	25.4	0.982344	25.68	0.947101
10	34.98	0.444	34.66	2.04524	28.92	0.810555	26.56	1.1149	24.36	0.630872	25.908	0.911768
25	36.36	0.416	36.18	1.54013	35.7	1.21244	31.54	3.16749	24	0

## Sheet: Figure 1D
Time [hours]	Body temperature [°C]
	Control+100% LPS		IL-2/S4B6+100% LPS		IL-2/S4B6+50% LPS
	Mean	SD	Mean	SD	Mean	SD
0	36.5	0.23	36.4	0.29	36.6	0.23
2	36.4	0.3	33.7	1.52	34.3	0.48
4	36.4	0.29	30.9	2.28	29.7	1.5
6	33.9	0.83	29.3	1.1	29.3	2.1
8	31.8	0.51	27.4	0.49	31.3	0.25
24	28.7	0.58	26.1	0.05	34.8	0.59
32	31.2	0.99	30	0.6	35.6	0.32

## Sheet: Figure 1E
Control	TNF-α [ng/ml]					IL-2/JES6	TNF-α [ng/ml]					IL-2/S4B6	TNF-α [ng/ml]
LPS [% of MNLD]	Mean	SD	Mean	SD		LPS [% of MNLD]	Mean	SD	Mean	SD		LPS [% of MNLD]	Mean	SD	Mean	SD
100	3.19	0.26	2.9	0.14		100	33.4	1.43	31.6	1.41		100	12.8	1.49	12.2	0.66
10	0.7	0.1	0.97	0.14		10	26.7	1.47	27.6	1.75		10	10.9	0.42	10.2	1.05
1	0.17	0.03	0.26	0.01		1	26.2	1.25	23.9	0.66		1	6.67	0.88	4.83	0.9
0.1	0	0.03	0.05	0.01		0.1	1.99	0.22	2.37	0.06		0.1	0.46	0.14	0.36	0.09

## Sheet: Figure 1F
LPS [ng/ml]	TNF-α [pg/ml]							LPS [ng/ml]	INF-γ [pg/ml]
	Control		IL-2/JES6		IL-2/S4B6				Control		IL-2/JES6		IL-2/S4B6
	Mean	SD	Mean	SD	Mean	SD			Mean	SD	Mean	SD	Mean	SD
32	12.1314	6.093	227.88	13.552	72.7822	10.402		32	25.78	1.09	281.92	48.44	52.48	3.72
10	12.2805	8.461	184.851	10.616	68.458	9.205		10	35.1	17.18	419.01	42.89	93.24	8.55
3.2	12.0184	6.601	146.933	16.701	63.2707	7.151		3.2	48.09	32.19	331.06	6.95	59.37	13.23
1	8.24499	5.475	84.3452	6.6	44.7604	8.929		1	21.62	12.57	239.02	40.03	68.51	17.31
0.32	5.8407	3.22	37.6492	5.61	27.216	4.39		0.32	15.56	2.98	34	6.2	26.41	5.24
0.1	1.95091	0.755	10.1475	1.732	10.2519	1.905		0.1	25.56	24.36	52.69	11.11	31.71	3.06
