# Supplementary material for: IL-2/JES6-1 mAb complexes dramatically increase sensitivity to LPS through IFN-γ production by CD25+Foxp3- T cells
Source: eLife. 2021 Dec 21;10:e62432. doi: 10.7554/eLife.62432 (PMC8691839; doi:10.7554/eLife.62432)
Supplement: Figure 2—source data 1. [file elife-62432-fig2-data1.xlsx]

## Sheet: Figure 2A
Time [hours]	Body temperature [°C]
	Control+50% LPS		IL-2+50% LPS
	Mean	SD	Mean	SD
0	38.0667	0.169967	38.2833	0.109545
2	36.6333	0.488763	36.2833	0.915454
4	36.6167	1.2954	36.0333	0.786695
6	36.2667	0.410961	33.7667	0.649786
8	35.3	0.506623	32.8833	1.13932
24	36.9333	0.368179	36.3333	0.825967
48	37.2	0.216025	36.9667	0.256038

## Sheet: Figure 2B
Time [hours]	Body temperature [°C]
	Control+50% LPS		pHPMA-IL-2+50% LPS		pHPMA-IL-2+25% LPS		pHPMA-IL-2+10% LPS
	Mean	SD	Mean	SD	Mean	SD	Mean	SD
0	36.6	0.27	36.55	0.22	36.65	0.32	36.5	0.32
3	36.05	0.23	32.08	0.59	33.03	0.4	34.1	0.32
4	35.83	0.54	31	0.52	32.63	0.4	33.73	0.48
6	35.05	0.48	27.93	0.47	28.95	0.72	31.4	0.89
8	33.48	0.83	26.98	0.86	28.53	0.63	32.48	0.38
24	35.4	0.37	28.6	0.8	32.43	0.8	35.05	0.27

## Sheet: Figure 2C
Time [hours]	IL-2/JES6+10% LPS										Time [hours]	IL-2/S4B6+35% LPS
	Control (no IL-2)		1.5 ug		0.5 ug		0.15 ug					Control (no IL-2)		1.5 ug		0.5 ug		0.15 ug
	Mean	SD	Mean	SD	Mean	SD	Mean	SD				Mean	SD	Mean	SD	Mean	SD	Mean	SD
0	36.325	0.25	36.325	0.25	36.325	0.25	36.325	0.25			0	37.1	0.1	37.1	0.1	37.1	0.1	37.1	0.1
2	36.475	0.05	37.15	0.7	36.875	0.2	37.15	0.15			2	36.9	0.1	36.4	0.65	36.925	0.55	36.75	0.15
4	35.825	0.75	36.725	0.55	36.075	0.75	36.95	0.5			4	35.7	0.3	33.575	3.25	35.7	0.85	36.5	0.05
6	35.3	1.35	36.175	0.8	35.8	0.25	36.725	0			6	33.8	0.6	31.8	1.6	33.725	0.85	35.35	0.8
8	34.775	0.25	35.7	0.85	34.55	0.35	36.4	0.05			8	32.1	1.1	30.875	1.95	31.825	0.9	33.85	0.15
24	35.775	0.75	36.2	0.45	36.05	0.15	36.375	0.25			24	31.8	1.5	31.725	0.25	32.75	0.7	35.55	1.85

## Sheet: Figure 2D
Groups	TNF-α [ng/ml]						Groups	IL-12 [ng/ml]
	Mean	SD	Mean	SD				Mean	SD	Mean	SD
Control	2.4	0.51	2.92	0.2			Control	0.88	0.04	0.98	0.1
IL-2/JES6	39.3	1.12	41.69	0.72			IL-2/JES6	4.23	0.172	4.09	0.203
IL-2/JES6+αCD25	4.17	0.33	3.45	0.42			IL-2/JES6+αCD25	1.5	0.06	1.27	0.035
IL-2/JES6+αCD4	41.01	1.22	42.45	0.76			IL-2/JES6+αCD4	3.56	0.221	3.61	0.165

## Sheet: Figure 2E
Time [hours]	Body temperature [°C]
	IL-2/JES6+10% LPS (Control)		IL-2/JES6+CD25+10% LPS		IL-2/JES6+CD4+10% LPS
	Mean	SD	Mean	SD	Mean	SD
0	36.63	0.35	36.63	0.29	36.7	0.41
3	33.4	1.42	37.18	0.92	34.38	1.15
6	28.05	0.54	36.43	0.73	28.68	1.78
8	26.23	0.48	37.1	0.53	26.25	0.5
24			36.4	0.21
