# Supplementary material for: IL-2/JES6-1 mAb complexes dramatically increase sensitivity to LPS through IFN-γ production by CD25+Foxp3- T cells
Source: eLife. 2021 Dec 21;10:e62432. doi: 10.7554/eLife.62432 (PMC8691839; doi:10.7554/eLife.62432)
Supplement: Figure 3—figure supplement 1—source data 1. [file elife-62432-fig3-figsupp1-data1.xlsx]

## Sheet: Fig. 3 - figure supplement 1
Groups	% of CD11b+ cells in the spleen		A
	Mean	SD
Control	6.527	0.5874
IL-2/JES6	9.46	2.422
IL-2/S4B6	6.015	1.105
Groups	% CD11b+Ly6G+ cells in the spleen		B
	Mean	SD
Control	2.247	0.2833
IL-2/JES6	4.15	1.521
IL-2/S4B6	1.25	0.5226
Groups	% CD11b+Ly6G-Ly6Chigh cells in the spleen		C
	Mean	SD
Control	0.7733	0.08892
IL-2/JES6	1.292	0.6938
IL-2/S4B6	0.37	0.1105
Groups	% CD11b+Ly6G-Ly6Clow cells in the spleen		D
	Mean	SD
Control	2.447	0.3738
IL-2/JES6	2.918	0.3943
IL-2/S4B6	4.017	0.634
Groups	% CD11b+SiglecF+Ly6G- cells in the spleen		E
	Mean	SD
Control	0.038	0.02536
IL-2/JES6	0.08	0.01906
IL-2/S4B6	0.0205	0.01897
Groups	% CD3-B220-CD11c+ cells in the spleen		F
	Mean	SD
Control	1.063	0.1494
IL-2/JES6	2.147	0.3381
IL-2/S4B6	1.232	0.1715
Groups	% CD3-B220-CD11c+ MHCII+CD8+ cells in the spleen		G
	Mean	SD
Control	0.1305	0.0227
IL-2/JES6	0.271	0.06968
IL-2/S4B6	0.197	0.04737
