# Supplementary material for: IL-2/JES6-1 mAb complexes dramatically increase sensitivity to LPS through IFN-γ production by CD25+Foxp3- T cells
Source: eLife. 2021 Dec 21;10:e62432. doi: 10.7554/eLife.62432 (PMC8691839; doi:10.7554/eLife.62432)
Supplement: Figure 3—figure supplement 2—source data 1. [file elife-62432-fig3-figsupp2-data1.xlsx]

## Sheet: Fig. 3 - figure supplement 2
Groups	% MHCII+ of CD11b+Ly6G-Ly6Chigh cells in the spleen		A
	Mean	SD
Control	33.03	15.18
IL-2/JES6	72.75	20.73
IL-2/S4B6	37.47	6.407
Groups	% MHCII+ of CD11b+Ly6G-Ly6Clow cells in the spleen		B
	Mean	SD
Control	50.15	11.4
IL-2/JES6	68.27	8.551
IL-2/S4B6	24.65	4.212
Groups	MHCII level (MFI) on CD11b+Ly6G-Ly6Chigh cells in the spleen		C
	Mean	SD
Control	4347	793.7
IL-2/JES6	7707	1228
IL-2/S4B6	7536	1605
Groups	MHCII level on (MFI) CD11b+Ly6G-Ly6Clow cells in the spleen		D
	Mean	SD
Control	17146	3399
IL-2/JES6	23018	3866
IL-2/S4B6	19727	1875
