# Supplementary material for: IL-2/JES6-1 mAb complexes dramatically increase sensitivity to LPS through IFN-γ production by CD25+Foxp3- T cells
Source: eLife. 2021 Dec 21;10:e62432. doi: 10.7554/eLife.62432 (PMC8691839; doi:10.7554/eLife.62432)
Supplement: Figure 3—figure supplement 4—source data 1. [file elife-62432-fig3-figsupp4-data1.xlsx]

## Sheet: Fig. 3 - figure supplement 4
Groups	Relative normalized TLR4 expression
	Mean	SD
Control	0.9462	0.147
IL-2/JES6	0.9481	0.2182
IL-2/S4B6	0.8766	0.3748
