# Supplementary material for: IL-2/JES6-1 mAb complexes dramatically increase sensitivity to LPS through IFN-γ production by CD25+Foxp3- T cells
Source: eLife. 2021 Dec 21;10:e62432. doi: 10.7554/eLife.62432 (PMC8691839; doi:10.7554/eLife.62432)
Supplement: Figure 3—figure supplement 5—source data 1. [file elife-62432-fig3-figsupp5-data1.xlsx]

## Sheet: Fig. 3 - figure supplement 5
Groups	TLR4 level (MFI) on CD11b+Ly6G-Ly6Chigh cells in the spleen		B
	Mean	SD
Control	341.7	41.04
IL-2/JES6	334.3	79.33
IL-2/S4B6	319.8	72.68
Groups	TLR4 level (MFI) on CD11b+Ly6G-Ly6Clow cells in the spleen		D
	Mean	SD
Control	713.2	81.68
IL-2/JES6	604.8	81.96
IL-2/S4B6	431.4	431.4
Groups	TLR4 level (MFI) on CD11b+Ly6G+ cells in the spleen		F
	Mean	SD
Control	1041	145.3
IL-2/JES6	748.3	89.27
IL-2/S4B6	821.2	122.1
