# Supplementary material for: IL-2/JES6-1 mAb complexes dramatically increase sensitivity to LPS through IFN-γ production by CD25+Foxp3- T cells
Source: eLife. 2021 Dec 21;10:e62432. doi: 10.7554/eLife.62432 (PMC8691839; doi:10.7554/eLife.62432)
Supplement: Figure 3—figure supplement 7—source data 1. [file elife-62432-fig3-figsupp7-data1.xlsx]

## Sheet: Fig. 1 - figure supplement 1
Time [hours]	Control+100% LPS		IL-2/JES6+10% LPS		IL-2/JES6+NaNO2+10% LPS
	Mean	SD	Mean	SD	Mean	SD
0	36	0.23	36	0.38	36	0.37
2	36	0.3	33	0.48	36	1.87
4	36	0.29	28	0.8	35	1.51
6	34	0.83	26	0.36	33	1.43
8	32	0.51	25	0.36	33	1.32
24	29	0.58			37	0.82
32	31	0.99			37	0.49

## Sheet: Fig. 1 - figure supplement 2
Groups	Lung wet weight (g)
	Mean	SD
Control	0.1095	0.007738
IL-2/JES6	0.1762	0.01901
IL-2/S4B6	0.128	0.01246

## Sheet: Fig. 3 - figure supplement 7
Groups	% of CD45+ cells in the lungs		A
	Mean	SD
Control	26.7	3.86
IL-2/JES6	34.77	3.11
IL-2/S4B6	58.4	10.5
Groups	% of CD11b+CD14+ cells from of CD45+ cells in the lungs		B
	Mean	SD
Control	11.47	0.72
IL-2/JES6	18.6	4.24
IL-2/S4B6	11.06	2.97
Groups	% of CD11b+CD14+ cells in the lungs		C
	Mean	SD
Control	3.05	0.29
IL-2/JES6	6.4	1.21
IL-2/S4B6	6.3	1.13
