# Supplementary material for: IL-2/JES6-1 mAb complexes dramatically increase sensitivity to LPS through IFN-γ production by CD25+Foxp3- T cells
Source: eLife. 2021 Dec 21;10:e62432. doi: 10.7554/eLife.62432 (PMC8691839; doi:10.7554/eLife.62432)
Supplement: Figure 3—source data 1. [file elife-62432-fig3-data1.xlsx]

## Sheet: Figure 3B
Groups	% of CD11b+CD14+ cells
	Spleen		Blood
	Mean	SD	Mean	SD
Control	2.674	0.48	7.162	2.07657
IL-2/JES6	5.049	0.5	9.642	1.21513
IL-2/S4B6	1.731	0.22	0.488	0.170932

## Sheet: Figure 3C
Groups	CD11b+CD14+ cells in spleen (x106)
	Mean	SD
Control	2.14	0.56
IL-2/JES6	6.07	0.81
IL-2/S4B6	3.81	0.69

## Sheet: Figure 3E
Groups	CD11b+ CD14+ cells producing TNF-α [%]
	0.00 μg/ml LPS		0.05 μg/ml LPS		1.00 μg/ml LPS
	Mean	SD	Mean	SD	Mean	SD
Control	1.29	0.12083	15	3.51283	13.475	3.20039
IL-2/JES6	4.4	0.6	44.2	8.59	44.7	5.36
IL-2/S4B6	6.9	2.08	61.8	3.36	59.8	3.87

## Sheet: Figure 3G
Groups	TNF-α producing cells in blood [%]
	0.00 μg/ml LPS		0.05 μg/ml LPS		1.00 μg/ml LPS
	Mean	SD	Mean	SD	Mean	SD
Control	1.04325	0.230145	3.153	1.34531	2.973	0.727461
IL-2/JES6	1.43975	0.35806	7.365	1.24768	7.5625	0.396768
IL-2/S4B6	0.29675	0.092752	0.90825	0.159364	0.90875	0.178916

## Sheet: Figure 3I
Groups	% of CD25+ cells in CD11b+CD14+ population
	Spleen		Liver
	Mean	SD	Mean	SD
Control	0.958	0.29	0.555	0.17
IL-2/JES6	9.51	2.78	6.823	1.57
IL-2/S4B6	2.603	0.46	1.848	0.56
