# Supplementary material for: IL-2/JES6-1 mAb complexes dramatically increase sensitivity to LPS through IFN-γ production by CD25+Foxp3- T cells
Source: eLife. 2021 Dec 21;10:e62432. doi: 10.7554/eLife.62432 (PMC8691839; doi:10.7554/eLife.62432)
Supplement: Figure 4—figure supplement 1—source data 1. [file elife-62432-fig4-figsupp1-data1.xlsx]

## Sheet: Fig. 4 - figure supplement 1
			Control + 50% LPS			AT only + 50% LPS			IL-2/JES6 only + 50% LPS				AT + IL-2/JES6 + 50% LPS
	Time (hours)		Mean	SD		Mean	SD		Mean	SD			Mean	SD
	0		36.83	0.25		36.65	0.33		36.68	0.48			36.63	0.34
	2		35.75	0.37		35.78	0.51		34.53	0.57			34.05	0.26
	4		34.58	0.48		34.2	0.24		33.68	0.5			31.63	0.57
	6		34.25	0.45		34.05	0.33		33.33	0.58			28.7	0.88
	8		34.08	0.68		34.03	0.35		33.48	0.67			27.43	0.62
	24		35.25	0.55		35.13	0.4		36	0.26
