# Supplementary material for: IL-2/JES6-1 mAb complexes dramatically increase sensitivity to LPS through IFN-γ production by CD25+Foxp3- T cells
Source: eLife. 2021 Dec 21;10:e62432. doi: 10.7554/eLife.62432 (PMC8691839; doi:10.7554/eLife.62432)
Supplement: Figure 4—figure supplement 2—source data 1. [file elife-62432-fig4-figsupp2-data1.xlsx]

## Sheet: Fig. 4 - figure supplement 2
Time [hours]	IL-2/JES6+10%LPS		IL-2/JES6+IFN-+50%LPS		FN-+IL-2/JES6+50% LPS		B
	Mean	SD	Mean	SD	Mean	SD
0	36.53	0.29	36.38	0.31	36.68	0.29
2	33.08	0.75	31.48	1.22	30.88	0.68
4	28.2	0.85	28.08	1.42	27.85	0.24
6	26.38	0.57	26.05	1.29	27.23	1.14
10	25.93	0.22	25.77	1.19	26.95	1.17
24			33.6	0.47	35.38	0.25
