# Supplementary material for: IL-2/JES6-1 mAb complexes dramatically increase sensitivity to LPS through IFN-γ production by CD25+Foxp3- T cells
Source: eLife. 2021 Dec 21;10:e62432. doi: 10.7554/eLife.62432 (PMC8691839; doi:10.7554/eLife.62432)
Supplement: Figure 4—source data 1. [file elife-62432-fig4-data1.xlsx]

## Sheet: Figure 4A
C57BL/6
Time [hours]	IFN-γ [ng/ml]				TFN-α [ng/ml]				IL-1β [ng/ml]				IL-12 [ng/ml]				IL-6 [ng/ml]
	Control+100% LPS		IL-2/JES6+10 % LPS		Control+100% LPS		IL-2/JES6+10 % LPS		Control+100% LPS		IL-2/JES6+10 % LPS		Control+100% LPS		IL-2/JES6+10 % LPS		Control+100% LPS		IL-2/JES6+10 % LPS
	Mean	SD	Mean	SD	Mean	SD	Mean	SD	Mean	SD	Mean	SD	Mean	SD	Mean	SD	Mean	SD	Mean	SD
2	0	0	0	0	3.41188	0.386808	43.4033	2.1533	0.447626	0.090804	0.546392	0.039793	0.86	0.1	1.88	0.08	67.1332	4.60122	114.318	8.85651
3	0	0	0.149792	0.0467918	1.63887	0.086646	9.50091	0.346143	0.577027	0.152462	1.9149	0.184461	1.525	0.035	3.635	0.285	61.1722	3.00544	124.739	14.3605
4	0.0053514	0.0053514	0.432351	0.121351	0.605775	0.09592	7.69593	0.636862	0.548342	0.038238	2.13279	0.075899	1.38	0.06	5.485	0.155	35.5657	1.00918	131.472	12.1874
6	3.61759	0.2426	3.4042	0.238152	0.400668	0.080241	3.94439	0.412422	0.435	0.025	1.925	0.095	0.91	0	5.155	0.355	31.6221	1.66853	98.0336	6.967
8	3.04292	0.438924	0.606615	0.0421313	0	0	1.27039	0.086552	0.395	0.025	1.665	0.185	0.7	0.1	3.545	0.415	13.95	1.75	94.45	1.95
BALB/c
Time [hours]	IFN-γ [ng/ml]				TFN-α [ng/ml]				IL-1β [ng/ml]				IL-12 [ng/ml]				IL-6 [ng/ml]
	Control+100% LPS		IL-2/JES6+10 % LPS		Control+100% LPS		IL-2/JES6+10 % LPS		Control+100% LPS		IL-2/JES6+10 % LPS		Control+100% LPS		IL-2/JES6+10 % LPS		Control+100% LPS		IL-2/JES6+10 % LPS
	Mean	SD	Mean	SD	Mean	SD	Mean	SD	Mean	SD	Mean	SD	Mean	SD	Mean	SD	Mean	SD	Mean	SD
2	0	0	0	0	8.36695	0.193631	17.6193	1.32518	0.276272	0.061334	0.345358	0.043905	0.49	0.18	1.01	0.14	31.0167	0.06656	52.0243	6.29478
3	0.015618	0.015618	0.072194	0.072194	1.56267	0.001351	1.94869	0.455009	0.39606	0.016813	0.315849	0.087583	1.165	0.155	2.175	0.385	28.552	0.65487	29.6087	1.82287
4	0.676966	0.063966	7.17134	0.721718	0.625344	0.086606	1.90361	0.025706	0.310583	0.063249	0.235391	0.015028	1.44	0.01	2.175	0.015	19.6455	0.978089	25.4422	0.95227
6	3.50759	0.416431	13.2106	0.327495	0.35064	0.152295	0.70982	0.025154	0.37	0.02	0.305	0.025	1.065	0.015	1.48	0.12	14.2262	1.64061	22.5029	1.35996
8	5.11576	0.050415	6.72659	0.180528	0	0	-0.17177	0.277702	0.23	0.07	0.215	0.025	0.595	0.035	0.995	0.125	6.935	0.615	7.185	0.645

## Sheet: Figure 4B
Time [hours]	Body temperature [°C]
	Control+LPS100%		IL-2/JES6+LPS100%		IL-2/JES6+LPS50%		IL-2/JES6+LPS25%		IL-2/JES6+LPS10%
	Mean	SD	Mean	SD	Mean	SD	Mean	SD	Mean	SD
0	36.75	0.492443	36.875	0.192029	36.775	0.303109	36.75	0.357071	36.675	0.326917
3	35.35	0.384057	33.225	0.549432	32.875	0.248747	33.925	0.147902	34.175	0.798044
7	34.375	0.858414	29.825	0.286138	29.85	0.403113	30.92	0.696419	33.225	0.711952
24	34.325	0.867107	33.6	0	34	0	34.275	0.438035	35.3	0.680074

## Sheet: Figure 4C
Time [hours]	Body temperature [°C]
	Control+LPS100%		IL-2/JES6+LPS100%		IL-2/JES6+LPS50%		IL-2/JES6+LPS25%
	Mean	SD	Mean	SD	Mean	SD	Mean	SD
0	36.6	0.494975	36.525	0.286138	36.5	0.291548	36.675	0.396074
2	36.175	0.496865	33.075	0.746241	31.9	0.681909	30.875	1.92142
4	34.775	0.9523	28.2	0.851469	29.075	0.238485	27.85	0.471699
6	33.7	0.874643	26.375	0.56734	27.975	1.14222	27.225	0.311247
10	33.075	1.01581	25.925	0.216506	30.375	1.16732	26.95	1.26787
24	36.8	0.212132			36.1	0.254951	35.375	0.559017

## Sheet: Figure 4D
Time [hours]	Body temperature [°C]
	Control+LPS100%		IL-2/JES6+LPS100%		IL-2/JES6+LPS50%		IL-2/JES6+LPS25%
	Mean	SD	Mean	SD	Mean	SD	Mean	SD
0	37.34	0.47	37.64	0.7	37.56	0.83	37.6	0.35
2	35.7	0.12	35.06	1.55	34.12	1.19	35.72	0.94
4	33.44	0.61	34.08	1.67	33.46	1.82	34.36	1.14
6	33.08	1.11	33.88	2.44	32.76	2	33.64	1.17
8	32.74	0.87	33.53	1.84	32.8	1.62	33.5	0.64
24	31.92	1.03	35.83	1.72	33.6	1.7	36.3	1.02

## Sheet: Figure 4E
Time [hours]	Body temperature [°C]
	Control+50% LPS		AT+50% LPS		IL-2/JES6+50% LPS		AT+IL-2/JES6+50% LPS
	Mean	SD	Mean	SD	Mean	SD	Mean	SD
0	36.8	0.2	36.833	0.31	36.867	0.12	36.767	0.32
2	35.333	0.21	34.967	0.21	34.9	0.36	32.967	0.86
4	33.633	0.21	33.8	1.15	32.133	0.49	29.133	0.61
6	33.267	0.57	33.533	0.45	32.367	0.76	27.267	0.65
8	33.4	0.5	33.4	0.52	32.233	0.4	26.95	0.21
24	32.8	0.55	34.533	0.49	34.567	0.95
