# Supplementary material for: IL-2/JES6-1 mAb complexes dramatically increase sensitivity to LPS through IFN-γ production by CD25+Foxp3- T cells
Source: eLife. 2021 Dec 21;10:e62432. doi: 10.7554/eLife.62432 (PMC8691839; doi:10.7554/eLife.62432)
Supplement: Figure 5—source data 1. [file elife-62432-fig5-data1.xlsx]

## Sheet: Figure 5D
Groups	CD4+CD25+Foxp3-						CD4+CD25+Foxp3+						CD8+CD25+
	Spleen		Liver		Lungs		Spleen		Liver		Lungs		Spleen		Liver		Lungs
	Mean	SD	Mean	SD	Mean	SD	Mean	SD	Mean	SD	Mean	SD	Mean	SD	Mean	SD	Mean	SD
Control	0	0	0	0	0.2	0.34641	0.0933333	0.092376	0	0	0.533333	0.503322	2.01667	0.388501	0	0	8.35	0.494975
IL-2/JES6	3.01667	1.12001	7.86667	1.45717	2.36667	0.152753	0.966667	0.549939	4.63333	0.152753	1.36667	0.11547	7.03333	1.73877	16.4333	0.64291	6.53333	1.76163
IL-2/S4B6	2.62667	2.25187	2.9	1.83576	1.56667	0.750555	0.406667	0.20108	1.8	0.87178	0.5	0.360555	0.7	0.360555	3.73333	2.23681	3.3	3.50856

## Sheet: Figure 5B
Groups	CD4+						CD8+
	Spleen		Liver		Lungs		Spleen		Liver		Lungs
	Mean	SD	Mean	SD	Mean	SD	Mean	SD	Mean	SD	Mean	SD
Control	0.5475	0.13376	0.646667	0.20502	0.106667	0.109697	0.125	0.0173205	0.206667	0.0907377	0.02	0.0173205
IL-2/JES6	3.745	0.316702	6.64	1.83989	3.13667	0.685371	4.43	2.71614	8.1525	2.08602	0.75	0.544426
IL-2/S4B6	0.8	0.129615	0.275	0.0834666	1.49	1.27996	0.1775	0.057373	0.0975	0.0655108	0.396667	0.0757188
