# Supplementary material for: IL-2/JES6-1 mAb complexes dramatically increase sensitivity to LPS through IFN-γ production by CD25+Foxp3- T cells
Source: eLife. 2021 Dec 21;10:e62432. doi: 10.7554/eLife.62432 (PMC8691839; doi:10.7554/eLife.62432)
Supplement: Figure 6—figure supplement 1—source data 1. [file elife-62432-fig6-figsupp1-data1.xlsx]

## Sheet: Fig. 6 - figure supplement 1
			Control + 50% LPS			OVA + polyI:C + 50% LPS			IL-2/JES6 + 50% LPS
	Time (hours)		Mean	SD		Mean	SD		Mean	SD
	0		36.62	0.33		36.66	0.35		36.56	0.34
	2		37.38	0.18		37.46	0.46		34	0.73
	4		37.5	0.4		37.9	0.7		27.64	1.24
	6		36.24	0.73		35.84	0.61		26.43	0.55
	8		34.94	0.34		35.02	0.35		25.87	0.35
	24		35.68	0.38		35.44	0.34
	32		36.34	0.34		36.38	0.39
