# Supplementary material for: IL-2/JES6-1 mAb complexes dramatically increase sensitivity to LPS through IFN-γ production by CD25+Foxp3- T cells
Source: eLife. 2021 Dec 21;10:e62432. doi: 10.7554/eLife.62432 (PMC8691839; doi:10.7554/eLife.62432)
Supplement: Figure 6—source data 1. [file elife-62432-fig6-data1.xlsx]

## Sheet: Figure 6B
Groups	CD8+Ly5.1+		CD4+Ly5.1+
	Mean	SD	Mean	SD
Control	0.37	0.03	0.86	0.01
OT-1+II pept. + poly I:C	7.595	1.255	4.91	0.59
OT-1+II pept. + poly I:C + αIFN-γ	10.335	2.065	5.53	1.32

## Sheet: Figure 6C
Groups	Body temperature [°C]
	Control+50% LPS		AT+50% LPS		AT+stim.+50% LPS		AT+stim+IFN-+50% LPS
	Mean	SD	Mean	SD	Mean	SD	Mean	SD
0	37.67	0.63	36.73	0.54	37.67	0.39	36.9	0.36
2	36.65	0.55	35.65	0.51	35.13	1.33	35.9	0.77
4	36.33	0.33	35.65	0.52	31.2	3.36	33.48	2.05
6	34.95	0.66	34.08	0.94	30.43	2.71	33.07	2.71
24	33.32	2.6	32.55	3.05	35.85	0.1	35.48	1.03
48	36.43	0.66	34.33	2.96	37	0.1	36.63	0.41

## Sheet: Figure 6D
Groups	Body temperature [°C]
	IFN--/-+50% LPS		IFN--/-+IL-2/JES6+50% LPS		IFN-+/++IL-2/JES6+50% LPS
	Mean	SD	Mean	SD	Mean	SD
0	36.8	0.535413	37.8	0.408248	37.6667	0.288675
2	37.175	0.499166	37.225	0.368556	34.7	2.1166
4	36.275	1.36718	32.8	1.96638	29.5667	3.41223
6	35.625	1.25	32.95	1.96893	27.5333	3.44287
8	34.7	1.82391	33.45	1.33292	25.8333	1.65025
24	36.75	0.680686	36.5	0.547723

## Sheet: Figure 6E
Groups	Body temperature [°C]
	Mean	SD
IFN--/-+50% LPS	34.4923	1.36471
IFN--/-+IL-2/JES6+50% LPS	34.0643	1.85041
IFN-+/++IL-2/JES6+50% LPS	27.8438	1.35989
